# Supplementary material
Source: PubMed Central journal article supplement (PMC5864101)
Supplement: DCi160042SupplementaryData.pdf [file DCi160042SupplementaryData.pdf]

SUPPLEMENTARY DATA

**Supplementary Table 1. Relative hazards (95% CI) for the association between hemoglobin A1c cut points among individuals with and without diabetes (reference: no diabetes and an HbA1c between 5.0-5.6% for all comparisons) and all-cause and cause-specific mortality among 7,333 adults 65 years of age and older, NHANES III (1988-1994) and NHANES Continuous (1999-2004) through December 2011**

|                                     | <i>No Diabetes</i> |                     |                     | <i>Undiagnosed Diabetes</i> | <i>Diagnosed Diabetes</i> |                   |                   |                   |                 |
|-------------------------------------|--------------------|---------------------|---------------------|-----------------------------|---------------------------|-------------------|-------------------|-------------------|-----------------|
|                                     | <5.0%<br>n=381     | 5.0-5.6%<br>n=3,252 | 5.7-6.4%<br>n=2,080 | ≥ 6.5%<br>n=341             | <6.5%<br>n=447            | 6.5-7.0%<br>n=193 | 7.0-7.9%<br>n=272 | 8.0-8.9%<br>n=166 | ≥ 9.0%<br>n=201 |
| <b>All-cause mortality</b>          | 0.9                | 1.0**               | 1.1*                | 1.3                         | 1.3*                      | 1.6*              | 1.6*              | 2.2*              | 2.6*            |
|                                     | (0.7, 1.2)         | (reference)         | (1.0, 1.3)          | (1.0, 1.7)                  | (1.0, 1.6)                | (1.1, 2.5)        | (1.2, 2.3)        | (1.3, 3.7)        | (2.0, 3.4)      |
| Mortality/ 1,000 PY                 | 75.4               | 61.8                | 67.7                | 70.8                        | 77.5                      | 89.6              | 83.8              | 97.1              | 104.4           |
|                                     | (59.2, 64.6)       | (59.2, 64.6)        | (64.1, 71.4)        | (62.3, 80.5)                | (69.1, 86.9)              | (75.3, 106.5)     | (72.5, 96.8)      | (81.8, 115.2)     | (89.4, 121.9)   |
| <b>CVD mortality</b>                | 0.9                | 1.0**               | 1.1                 | 1.4                         | 1.1                       | 1.5               | 1.9               | 2.2               | 3.2*            |
|                                     | (0.5, 1.6)         | (reference)         | (0.9, 1.4)          | (0.8, 2.6)                  | (0.6, 2.0)                | (0.7, 3.2)        | (1.0, 3.7)        | (0.9, 5.0)        | (1.8, 5.7)      |
| Mortality/ 1,000 PY                 | 18.3               | 15.9                | 18.2                | 20.7                        | 20.0                      | 35.0              | 21.7              | 25.9              | 31.5            |
|                                     | (14.4, 23.1)       | (14.6, 17.3)        | (16.5, 20.2)        | (16.3, 26.2)                | (16.0, 25.1)              | (26.5, 46.2)      | (16.4, 28.8)      | (18.6, 36.1)      | (23.7, 41.8)    |
| <b>Cancer mortality</b>             | 0.8                | 1.0                 | 1.1                 | 0.9                         | 0.6                       | 0.9               | 0.9               | 2.7*              | 1.5             |
|                                     | (0.5, 1.3)         | (reference)         | (0.8, 1.5)          | (0.5, 1.6)                  | (0.2, 1.3)                | (0.3, 2.6)        | (0.5, 1.8)        | (1.3, 5.6)        | (0.6, 3.4)      |
| Mortality/ 1,000 PY                 | 14.3               | 11.8                | 13.3                | 12.8                        | 11.1                      | 5.6               | 10.4              | 15.6              | 13.1            |
|                                     | (10.9, 18.7)       | (10.7, 13.0)        | (11.8, 15.0)        | (9.4, 17.3)                 | (8.2, 15.0)               | (2.8, 11.2)       | (6.9, 15.7)       | (10.1, 23.9)      | (8.5, 20.4)     |
| <b>Non-cvd/non-cancer mortality</b> | 1.0                | 1.0**               | 1.2                 | 1.5                         | 1.7*                      | 2.1*              | 1.8*              | 1.8               | 2.9*            |
|                                     | (0.8, 1.3)         | (reference)         | (1.0, 1.4)          | (1.0, 2.2)                  | (1.3, 2.3)                | (1.2, 3.5)        | (1.2, 2.9)        | (0.8, 4.3)        | (2.0, 4.4)      |
| Mortality/ 1,000 PY                 | 42.9               | 34.2                | 36.1                | 37.4                        | 46.4                      | 49.0              | 51.6              | 55.6              | 59.7            |
|                                     | (36.7, 50.0)       | (32.2, 36.3)        | (33.5, 38.8)        | (31.3, 44.6)                | (40.0, 53.8)              | (38.8, 61.9)      | (43.0, 62.0)      | (44.3, 69.7)      | (48.6, 73.4)    |

\* $p < 0.05$

\*\* $p$  for trend  $< 0.001$

Data are weighted estimates

Models are adjusted for age, sex, education, race, current smoking status, body mass index, HDL cholesterol and hypertension
